# Supplementary material for: Regulated self-powered photoresponse properties and irradiance-adaptable behavior in ferroelectric SrTiO3/TiO2 heterojunction photodetectors
Source: Royal Society of Chemistry journal article supplement (doi:10.1039/d3tc01005h), 2023-01-01
Supplement: d3tc01005h1.pdf [file d3tc01005h1.pdf]

**Regulated Self-powered Photoresponse Properties and Irradiance-  
adaptable Behavior in Ferroelectric SrTiO<sub>3</sub>/TiO<sub>2</sub> Heterojunction  
Photodetectors**

Songyao Gao,<sup>a,b</sup> Jianping Xu,<sup>\*a</sup> Shaobo Shi,<sup>c</sup> Jing Chen,<sup>b</sup> Jianghua Xu,<sup>b</sup> Lina Kong,<sup>b</sup>

Xiaosong Zhang,<sup>b</sup> and Lan Li<sup>\*b</sup>

*<sup>a</sup>Tianjin Key Laboratory of Quantum Optics and Intelligent Photonics, School of Science, Tianjin University of Technology, Tianjin 300384, China*

*<sup>b</sup>School of Materials Science and Engineering, Key Laboratory of Display Materials and Photoelectric Devices, Ministry of Education, and Tianjin Key Laboratory for Photoelectric Materials and Devices, Tianjin University of Technology, Tianjin 300384, China*

*<sup>c</sup>School of Science, Tianjin University of Technology and Education, Tianjin 300222, China*

*\*Corresponding author. E-mail addresses: xjp0335@163.com (J. Xu), lilan@tjut.edu.cn (L.Li).*

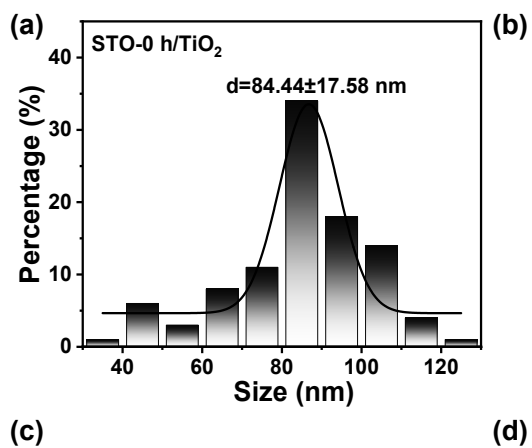

**Fig. S1** Histograms of the coarse and fine size analysis of STO/TiO<sub>2</sub> NRs with different conversion time (a) 0 h, (b) 3 h, (c) 4 h and (d) 5 h.

**Fig. S2** The cross-sectional SEM images of STO/TiO<sub>2</sub> NRs at different conversion time (a) 8 h and (b) 11 h.

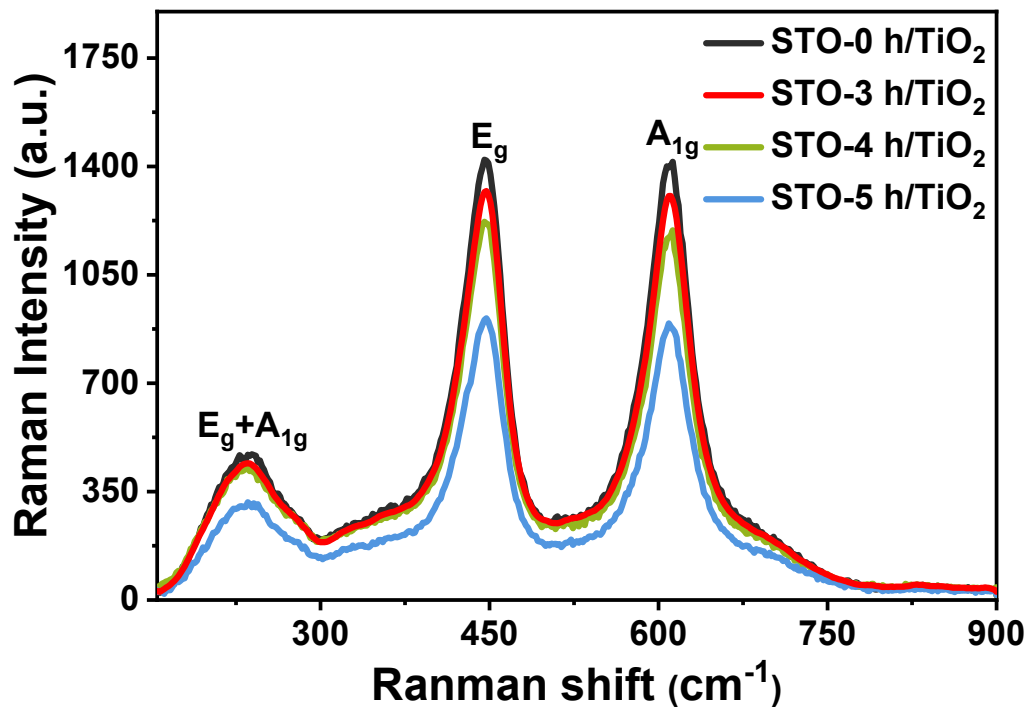

**Fig. S3** The Raman spectra of STO/TiO<sub>2</sub> NRs at different conversion time (a) 0 h, (b) 3 h, (c) 4 h and (d) 5 h.

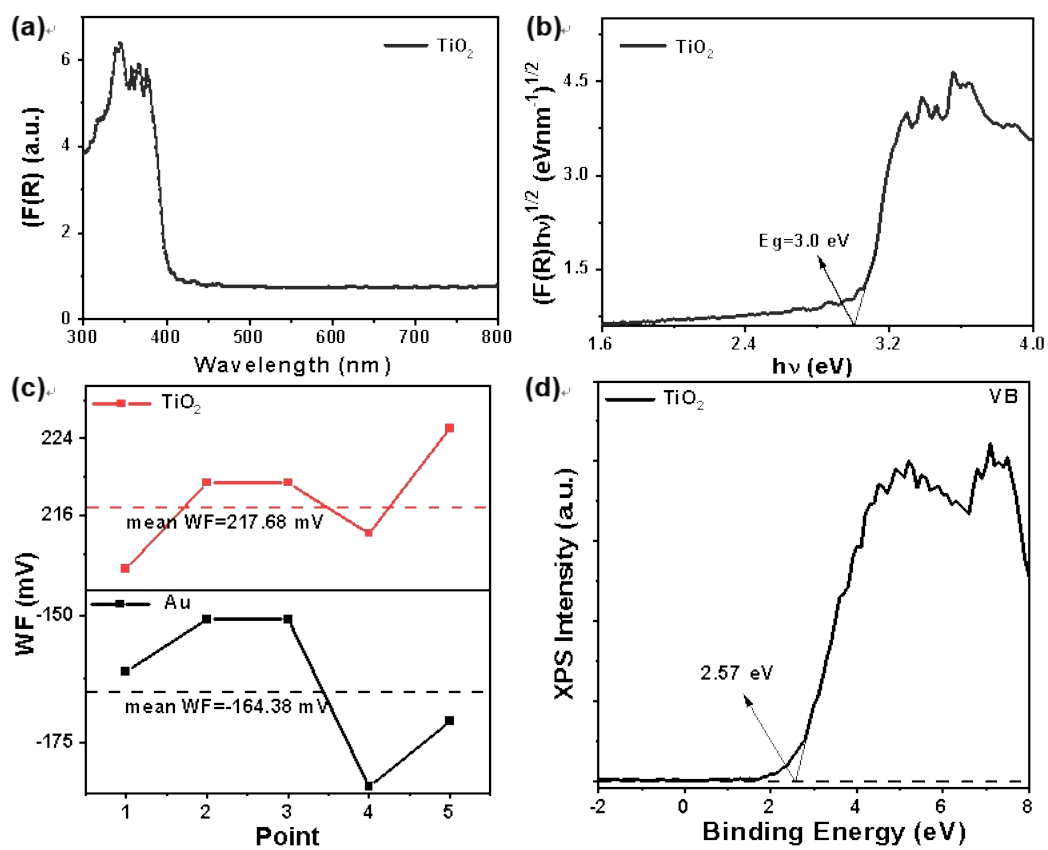

**Fig. S4** (a) Absorption spectra derived from diffuse reflectance spectra, (b) optical band-gap, (c) work function measured by Kelvin probe and (e) valence band spectra of TiO<sub>2</sub> NRs.

**Fig. S5** the I-V curves under dark (a) FTO/TiO<sub>2</sub>/FTO, In/STO-11 h/In (b) and (c) In/STO/TiO<sub>2</sub>/FTO for different conversion time. (d) The dark current of STO/TiO<sub>2</sub> PDs at zero bias for different conversion time.

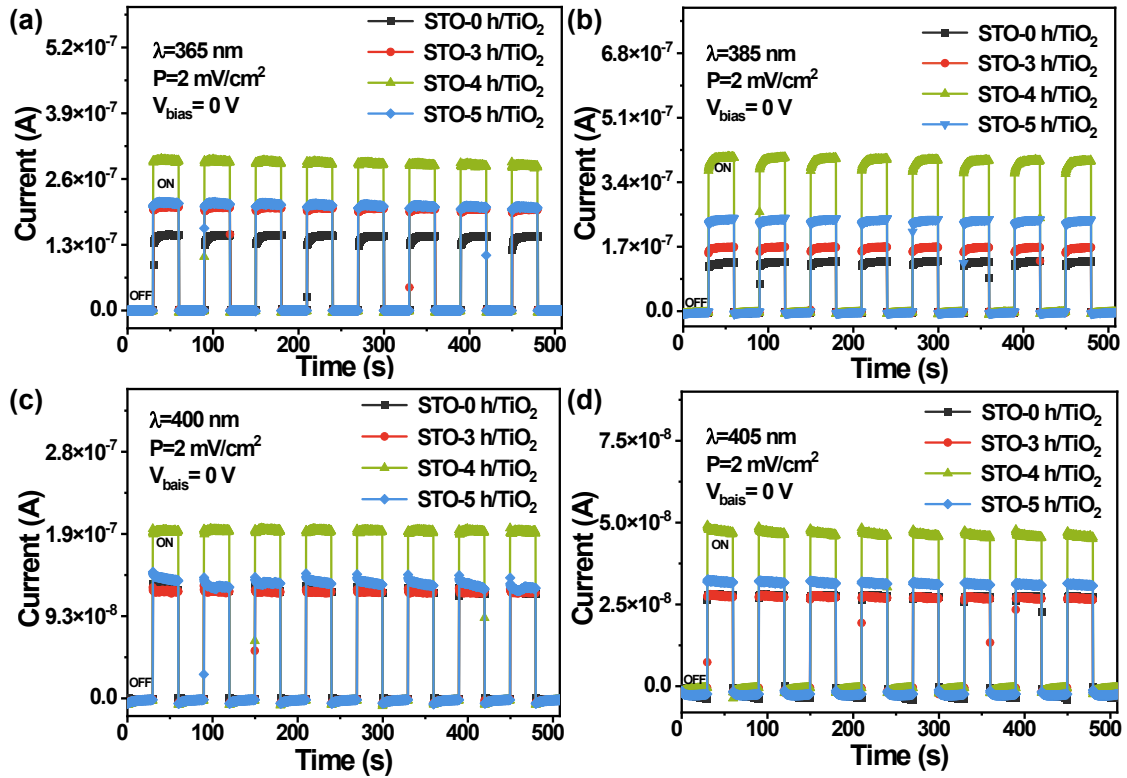

Fig. S6 I-t cycle curves of STO/TiO<sub>2</sub> PDs with different conversion time under different wavelength illumination: (a) 365 nm, (b) 385 nm, (c) 400 nm, and (d) 405 nm.

**Fig. S7** (a) I-t curves and (b) responsivity curves of STO/TiO<sub>2</sub> photodetectors at different conversion times under different wavelengths of light.



**Fig. S8** I-V curve (unpolarized) (a) and I-t curve at zero bias unpolarized (b), negative polarization (polarized at -5 V for 10 min) (c) and positive polarization (polarized at 5 V for 10 min) (d) of STO-4 h/TiO<sub>2</sub> PD under different light power densities of 375 nm illumination.

**Table S1.** Proportion of each element in STO/TiO<sub>2</sub> NRs prepared by different conversion time tested by EDS.

| Samples                  | Component/At% |        |        | Atomic Ratio |
|--------------------------|---------------|--------|--------|--------------|
|                          | Sr            | Ti     | O      | Sr: Ti       |
| STO-0 h/TiO <sub>2</sub> | 0             | 42.083 | 57.917 | 0            |
| STO-3 h/TiO <sub>2</sub> | 2.563         | 35.537 | 61.900 | 0.072        |
| STO-4 h/TiO <sub>2</sub> | 2.983         | 37.987 | 59.030 | 0.078        |
| STO-5 h/TiO <sub>2</sub> | 3.254         | 37.383 | 59.363 | 0.087        |

**Table S2.** The proportion of Ti1 and Ti2 in STO/TiO<sub>2</sub> NRs with different conversion time.

| Samples                  | Percentage (%) |      |
|--------------------------|----------------|------|
|                          | Ti1            | Ti2  |
| STO-0 h/TiO <sub>2</sub> | 100            | 0    |
| STO-3 h/TiO <sub>2</sub> | 90.2           | 9.8  |
| STO-4 h/TiO <sub>2</sub> | 82.0           | 18.0 |
| STO-5 h/TiO <sub>2</sub> | 71.1           | 28.9 |

**Table S3.** The proportion of O1 and O2 in STO/TiO<sub>2</sub> NRs with different conversion time.

| Samples                  | Percentage (%) |      |
|--------------------------|----------------|------|
|                          | O1             | O2   |
| STO-0 h/TiO <sub>2</sub> | 73.5           | 26.5 |
| STO-3 h/TiO <sub>2</sub> | 71.7           | 28.3 |
| STO-4 h/TiO <sub>2</sub> | 67.6           | 32.4 |
| STO-5 h/TiO <sub>2</sub> | 64.5           | 35.5 |

**Table S4.** Comparison of performance parameters of ferroelectric-based heterojunction self-driven PDs.

| Photodetector                 | $\lambda$<br>(nm) | R<br>(A/W)           | $\tau_r$<br>(ms) | $\tau_d$<br>(ms) | Ref.      |
|-------------------------------|-------------------|----------------------|------------------|------------------|-----------|
| NiO/PLZT                      | 350               | $1.8 \times 10^{-4}$ | 0.34             | 0.36             | 1         |
| ZnO/PLZT                      | 360               | $4.0 \times 10^{-3}$ | 0.04             | 0.05             | 2         |
| BEFO/NSTO                     | 405               | 19.7                 | 50               | 44               | 3         |
| BGFO/ZnO                      | 360               | $3.0 \times 10^{-2}$ | 9                | 2400             | 4         |
| MoS <sub>2</sub> -P(VDF-TrFE) | 532               | 12                   | 0.01-0.02        | -                | 5         |
| Graphene/LNO                  | 1064              | $2.9 \times 10^6$    | 23               | 23               | 6         |
| Perovskite/STO                | 550               | 0.73                 | 200              | <100             | 7         |
| STO/TiO <sub>2</sub>          | 375               | $1.4 \times 10^{-2}$ | 6.4              | 31.5             | This work |

## Reference:

- [1] J. Chen, D. You, Y. Zhang, T. Zhang, C. Yao, Q. Zhang, M. Li, Y. Lu, Y. He, *ACS Appl. Mater. Interfaces*, 2020, **12**, 53957-53965.
- [2] J. Chen, Z. Wang, H. He, J. Mao, Y. Zhang, Q. Zhang, M. Li, Y. Lu, Y. He, *Adv. Electron. Mater.*, 2021, **7**, 2100717.
- [3] M. Wei, J. Hao, M. Liu, L. Yang, Y. Xie, X. Wang, Z. Li, Y. Su, Z. Hu, J.-M. Liu, *J. Alloys Compd.*, 2022, **915**, 165451.
- [4] J.-P. Wang, H. Mana-ay, C.-S. Chen, S.-C. Haw, C.-S. Tu, P.-Y. Chen, *J. Alloys Compd.*, 2022, **902**, 163779.
- [5] L. Lv, F. Zhuge, F. Xie, X. Xiong, Q. Zhang, N. Zhang, Y. Huang, T. Zhai, *Nature Communications*, 2019, **10**, 3331.
- [6] H. Guan, J. Hong, X. Wang, J. Ming, Z. Zhang, A. Liang, X. Han, J. Dong, W. Qiu, Z. Chen, H. Lu, H. Zhang, *Adv. Opt. Mater.*, 2021, **9**, 2100245.
- [7] F. Cao, W. Tian, M. Wang, L. Li, *ACS Photonics*, 2018, **5**, 3731-3738.
